# Supplementary material for: Global marine phytoplankton dynamics analysis with machine learning and reanalyzed remote sensing
Source: PeerJ journal article supplement (doi:10.7717/peerj.17361), 2024-05-08
Supplement: Table_S1.pdf [file Table_S1.pdf]

**Table S1.** The Copernicus dataset statistical summary with respective symbols and their full forms

| Item    | Full-Form                           | Min      | Max      | Mean     | Standard Deviation | Unit                      |
|---------|-------------------------------------|----------|----------|----------|--------------------|---------------------------|
| spco2   | Surface CO <sub>2</sub>             | 27.6343  | 47.6918  | 37.09361 | 3.492898           | <i>Pa</i>                 |
| o2      | Dissolved Oxygen                    | 194.507  | 244.464  | 206.7071 | 8.010823           | <i>mmolm<sup>-3</sup></i> |
| no3     | Nitrate                             | 0.002294 | 16.1816  | 0.193351 | 0.678482           | <i>mmolm<sup>-3</sup></i> |
| po4     | Phosphate                           | 2.92E-05 | 0.109444 | 0.002674 | 0.005743           | <i>mmolm<sup>-3</sup></i> |
| phyc    | Total Phytoplankton                 | 0.799526 | 4.84236  | 1.328597 | 0.320024           | <i>mmolm<sup>-3</sup></i> |
| si      | Dissolved Silicate                  | 1.44312  | 15.2757  | 3.825409 | 0.951438           | <i>mmolm<sup>-3</sup></i> |
| ph      | pH                                  | 7.96545  | 8.1759   | 8.065236 | 0.036145           | -                         |
| fe      | Dissolved Iron                      | 0.000148 | 0.005593 | 0.001102 | 0.000499           | <i>mmolm<sup>-3</sup></i> |
| mlo2st  | Density Ocean Mixed Layer Thickness | 10.5289  | 129.093  | 27.94306 | 17.53611           | <i>m</i>                  |
| thetao  | Temperature                         | 16.6903  | 31.0023  | 26.58887 | 2.554278           | <i>°C</i>                 |
| bottomT | Sea Floor Potential Temperature     | 3.83077  | 29.2195  | 7.946663 | 7.265639           | <i>°C</i>                 |
| vo      | Northward Velocity                  | -1.24699 | 1.55522  | 0.052364 | 0.264279           | <i>ms<sup>-1</sup></i>    |
| uo      | Eastward Velocity                   | -1.1298  | 1.27384  | -0.00881 | 0.230234           | <i>ms<sup>-1</sup></i>    |
| so      | Salinity                            | 29.0002  | 36.9503  | 36.12722 | 0.506528           | <i>1e<sup>-3</sup></i>    |
| zos     | Sea Surface Height                  | -0.47762 | 0.786462 | -0.03472 | 0.178039           | <i>m</i>                  |
